# Supplementary material
Source: Springer Nature journal article supplement (https://www.springermedizin.de/resource/supplementary/12891_2013_2037_MOESM1_ESM.pdf/9510070)

# Estimated bias

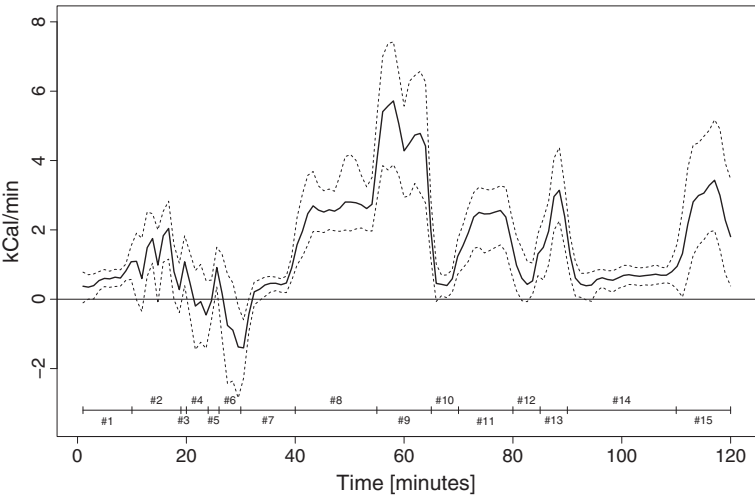

Supplement: MOESM1 [file 9510070]
